# Supplementary material for: Modulation of microbial communities and mucosal gene expression in chicken intestines after galactooligosaccharides delivery In Ovo
Source: PLoS One. 2019 Feb 27;14(2):e0212318. doi: 10.1371/journal.pone.0212318 (PMC6392319; doi:10.1371/journal.pone.0212318)
Supplement: S1 File — qPCR dataset for calculating (A) bacterial and (B) gene abundances. (XLSX) [file pone.0212318.s001.xlsx]

## Sheet: Bacteria-qPCR
S1 File A. qPCR dataset for calculating bacterial abundances
Shortcuts userd: GOS - galactooligosaacharides; C - control; D - duodenum; J - jejunum; I - ileum; X - caecum; IC - intestinal content; Uni - universal primer; LB - lactobacillus spp.; bifido - Bifidobacterium spp.
All qPCR reactions were made in quadruplicates; results represented as relative abundances of the bacteria
Sample ID	Ct Uni	mean	Ct LB	mean	Ct Bifido	mean		Uni/LB	Uni/Bifido	uni/lb %	uni/bifido %		DUODENUM
GOS- D-IC1	19.58	19.57	26.51	26.4333	25.58	25.7233		0.0126564	0.0161086	1.26564	1.61086						procent %
	19.67		26.33		25.97									uni/LB	Uni/Bifido		uni/LB	Uni/Bifido
	19.2		26.04		25.62								GOS	0.0126564	0.0161086	GOS	1.26564	1.61086
	19.46		26.46		26.57									0.0337008	0.0016174		3.37008	0.16174
GOS- D-IC2	16.53	16.42	21.89	21.7675	25.83	25.9367		0.0337008	0.0016174	3.37008	0.16174			0.0308918	0.0018712		3.08918	0.18712
	16.49		21.77		25.96									0.00813942	0.00316148		0.813942	0.316148
	16.24		21.68		26.02									0.0990584	0.00257042		9.90584	0.257042
	16.85		21.73		26.87									0.0157754	0.00081394		1.57754	0.081394
GOS- D-IC3	17.53	17.5425	23.05	23.04	26.82	26.85		0.0308918	0.0018712	3.08918	0.18712			0.0458711	0.00192912		4.58711	0.192912
	17.6		23.1		26.8									0.00791983	0.00578012		0.791983	0.578012
	17.51		22.92		26.79									0.0598157	0.00164762		5.98157	0.164762
	17.53		23.09		26.99									0.0232551	0.00482732		2.32551	0.482732
GOS- D- IC4	23.03	23.105	30.64	30.69	31.57	31.6667		0.00813942	0.00316148	0.813942	0.316148
	23.18		29.8		31.85								CONTROL	0.103632	0.000309923	CONTROL	10.3632	0.0309923
			29.43		32.07									0.213952	0.00212045		21.3952	0.212045
	21.73		30.74		31.58									0.0608046	0.000793258		6.08046	0.0793258
GOS- D-IC5	23.11	23.49	27.23	27.36	31.49	32.3575		0.0990584	0.00257042	9.90584	0.257042			0.0145985	0.00338196		1.45985	0.338196
	23.48		27.51		32.15									0.0412119	0.00169491		4.12119	0.169491
	23.54		27.25		32.55									0.0788555	0.000324009		7.88555	0.0324009
	23.45		27.45		32.18									0.0330855	0.000586862		3.30855	0.0586862
GOS-D- IC6	15.03	15.15	21.52	21.605	25.65	25.67		0.0157754	0.00081394	1.57754	0.081394
	15.23		21.67		25.67
	15.2		21.58		25.71
	15.14		21.65		25.65
GOS- D-IC7	14.29	13.9433	18.79	18.7867	23.54	23.19		0.0458711	0.00192912	4.58711	0.192912
	13.98		18.84		23.26
	13.91		18.73		23.12
	13.94		19.25		23.25
GOS-D- IC8	16.73	16.73	24.21	24.24	24.23	24.3767		0.00791983	0.00578012	0.791983	0.578012
	16.73		24.27		24.44
	15.21		23.69		24.46
	15.21		24		24.15
GOS-D- IC9	15.95	16.165	20.55	20.6533	25.62	25.6533		0.0598157	0.00164762	5.98157	0.164762
	16.19		20.78		25.82
	16.14		20.63		25.52
	17.07		22.82		32.05
GOS-D- IC10	20.88	20.915	26.97	26.8967	28.72	28.845		0.0232551	0.00482732	2.32551	0.482732
	20.95		26.86		29.19
	20.85		26.86		28.97		Mean	0.0337084	0.00403272
	20.98		27.63		30.46
CD- IC1	16.19	16.1767	19.82	19.8467	27.98	28.12		0.103632	0.000309923
	16.49		19.9		28.15
	16.15		19.82		28.07
	16.19		20.2		28.14
CD- IC2	17.21	17.26	20.25	19.87	26.29	26.3825		0.213952	0.00212045
	17.31		19.92		26.35
	15.98		19.46		26.45
	16.59		19.82		26.44
CD -IC3	20.15	20.1267	24.75	24.6625	29.98	30.7067		0.0608046	0.000793258
	20.17		24.72		30.55
	20.06		24.49		30.64
	20.78		24.69		30.93
CD- IC4	17.04	17.0975	23.64	23.7033	25.55	25.5333		0.0145985	0.00338196
	17.1		23.87		25.96
	17.02		23.43		25.53
	17.23		23.6		25.52
CD- IC5	15.61	15.025	19.95	20.0475	24.18	24.4667		0.0412119	0.00169491
	15		20.17		24.6
	14.56		19.91		24.24
	15.05		20.16		24.56
CD- IC6	16.8	16.62	20.65	20.705	28.12	28.5		0.0788555	0.000324009
	16.68		20.76		28.59
	16.5		20.17		28.48
	16.5		20.5		28.43
CD-IC7	22.03	22.115	27.72	27.5933	33.05	33.1467		0.0330855	0.000586862				ILEUM
	22.69		27.47		33.24											procent %
	22.2		27.59		33.15		ŚREDNIA DLA ODCINKA D-KONTROLA	0.07802	0.00131591					uni/LB	Uni/Bifido		uni/LB	Uni/Bifido
	24.25		29.87		34.65								GOS	0.0450933	0.00493888	GOS	4.50933	0.493888
GOS-I- IC1	16.82	16.855	21.75	21.7767	24.65	24.7333		0.0450933	0.00493888					0.083596	0.0136854		8.3596	1.36854
	17.11		21.86		24.81									0.226509	0.0142517		22.6509	1.42517
	16.89		21.72		24.74									0.00669204	0.00627825		0.669204	0.627825
	17.51		23.1		25.54									0.0280211	0.00196371		2.80211	0.196371
GOS-I- IC2	14.04	14.065	18.01	18.0167	20.09	20.4333		0.083596	0.0136854					0.0841533	0.00417419		8.41533	0.417419
	14.12		18.04		20.35									0.0871492	0.00157843		8.71492	0.157843
	14.08		18		20.43									0.098367	0.00489867		9.8367	0.489867
	14.02		18.81		20.52									0.0647672	0.00107017		6.47672	0.107017
GOS-I- IC3	16.43	18.0833	20.66	20.6233	24.3	24.41		0.226509	0.0142517
	16.59		20.63		24.42								CONTROL	0.283817	0.000397226	CONTROL	28.3817	0.0397226
	15.67		20.58		24.45									0.360973	0.000719863		36.0973	0.0719863
	16.25		21.26		24.47									0.315834	0.000725033		31.5834	0.0725033
GOS-I- IC4	21.49	21.5467	28.93	29.395	29.02	29.0933		0.00669204	0.00627825					0.117422	0.00574046		11.7422	0.574046
	21.97		29.24		29.73									2.70594e-05	0.00170127		0.00270594	0.170127
	21.55		29.55		29.12									0.117828	0.000825813		11.7828	0.0825813
	21.6		29.78		29.14									0.152029	0.00134886		15.2029	0.134886
GOS-I- IC5	16.1	16.362	21.95	21.9833	25.72	25.5933		0.0280211	0.00196371
	16.6		22.09		25.51
	16.49		21.91		25.29
	16.52		22.43		25.55
GOS-I- IC6	15.54	15.62	19.44	19.59	23.86	23.74		0.0841533	0.00417419
	15.67		19.77		23.65
	15.52		19.56		23.74
	15.75		20.49		23.71
GOS-I- IC7	14.07	14.175	18.09	18.0667	23.74	23.7175		0.0871492	0.00157843
	14.78		18.63		23.65
	13.91		18.01		23.78
	14.28		18.1		23.7
GOS-I- IC8	16.01	16.03	19.77	19.775	23.94	23.9167		0.098367	0.00489867
	16.18		20.01		23.92
	15.9		19.78		23.89
	17.62		22.52		24.17
GOS-I - IC9	15.1	15.07	19.28	19.42	25.26	25.1875		0.0647672	0.00107017
	15.1		19.56		25.15
	15.01		19.42		25.19		Mean	0.0804832	0.00587105
	15.98		22.51		25.15
CI- IC1	14.22	14.2325	16.28	16.3667	25.79	25.8025		0.283817	0.000397226
	14.34		16.48		25.81
	14.2		16.34		25.74
	14.17		18.92		25.87
CI- IC2	12.74	12.8	14.54	14.55	23.51	23.49		0.360973	0.000719863
	12.86		14.66		23.45
	11.49		14.45		23.47
	13		15.79		23.53
CI- IC4	14.51	14.785	16.79	16.77	25.1	25.4733		0.315834	0.000725033
	14.71		17.59		25.32
	14.22		16.75		25.63
	14.86		17.9		25.47
CI- IC5	16.2	16.1433	19.58	19.6267	23.83	23.7975		0.117422	0.00574046
	16.14		19.68		23.81
	16.09		19.62		23.78
	16.85		20.99		23.77
CI- IC6	16.65	16.6333	32.63	32.6	26.49	26.0767		2.70594e-05	0.00170127
	16.7		32.57		26.49
	16.55		32.21		25.25
	18.34				25.42
CI- IC7	14.54	14.315	17.81	17.76	25.04	24.81		0.117828	0.000825813
	14.09		17.97		24.94
			17.64		24.75
	13.56		17.62		24.74
CI- IC8	16.85	16.77	19.91	19.88	26.31	26.555		0.152029	0.00134886
	17.17		20.29		27.04
	16.69		19.85		26.8		Mean	0.192561	0.000397226
	17.21		21.24
GOS-J- IC1	21.21	20.95	27.64	27.4933	29.7	30.64		0.0159561	0.00145732
	20.94		27.57		30.73
	20.96		27.27		30.55
	23.52		36.18		37.53
GOS-J- IC2	19.22	18.6467	27.54	27.59	27.09	27.59		0.00309681	0.00240552
	18.21		27.59		27.74
	18.51		27.64		27.44
	19.28		28.75		28.26								JEJUNUM
GOS-J- IC3	17.66	17.63	24.15	24.235	25.58	25.6367		0.0147018	0.00453647								procent %
	17.79		24.32		25.47									uni/LB	Uni/Bifido		uni/LB	Uni/Bifido
	17.2		23.91		25.3
	17.44		25.99		25.86								GOS	0.0159561	0.00145732	GOS	1.59561	0.145732
GOS-J- IC4	28.29	28.205												0.00309681	0.00240552		0.309681	0.240552
	29.12													0.0147018	0.00453647		1.47018	0.453647
	28.12													0.229263	0.024961		22.9263	2.4961
	28.53													0.0456489	0.0173188		4.56489	1.73188
GOS-J- IC5	20.3	20.36	22.9	22.9233	26.13	25.8733		0.229263	0.024961					0.0354002	0.0214827		3.54002	2.14827
	20.45		22.94		25.86									0.0225597	0.0336967		2.25597	3.36967
	20.44		22.93		25.82									0.0251837	0.0212872		2.51837	2.12872
	20.25		23.91		25.94									0.0234334	0.0172241		2.34334	1.72241
GOS-J- IC6	19.52	19.145	24.07	24.09	25.43	25.19		0.0456489	0.0173188
	19.96		24.2		25.06								CONTROL	0.0474832	0.0105255	CONTROL	4.74832	1.05255
	19.21		24		25.9									0.141074	0.00157913		14.1074	0.157913
	19.08		25.13		25.32									0.0312035	0.0141348		3.12035	1.41348
GOS-J- IC7	19.13	19.125	24.52	24.4483	24.82	24.8533		0.0354002	0.0214827					0.0322429	0.00477186		3.22429	0.477186
	19.12		24.6		25.13									0.0352664	0.00634891		3.52664	0.634891
	18.76		24.17		24.84									0.0121313	0.036273		1.21313	3.6273
	29.76		24.28		24.9									0.147587	0.000400899		14.7587	0.0400899
GOS-J- IC8	18.78	18.7	24.57	24.6867	23.72	23.765		0.0225597	0.0336967
	19.08		24.78		24.16
	18.62		24.71		23.81
	19.99		25.8		25.52
GOS-J- IC9	18.69	18.73	24.53	24.5533	24.43	24.47		0.0251837	0.0212872
	19.16		24.67		24.86
	18.77		24.46		24.51
	20.02		25.71		26.04
GOS-J- IC10	21.22	21.45	27.28	27.43	27.3	27.5133		0.0234334	0.0172241
	21.65		27.46		27.6
	21.28		27.07		27.64		Mean	0.0461382	0.0160411
	22.98		27.55		28.28
CJ- IC1	21.11	21	25.91	25.92	27.79	27.785		0.0474832	0.0105255
	21.53		26.44		28.09
	20.85		25.93		27.78
	21.04		26.7		29.09
CJ -IC3	16	16.005	19.17	19.2125	25.04	25.555		0.141074	0.00157913
	16.01		19.27		25.49
	15.72		19.19		25.23
	16.83		19.22		25.62
CJ -IC4	18.68	18.7333	24.15	24.2375	25.12	25.075		0.0312035	0.0141348
	18.76		24.29		24.67
	18.76		24.3		25.03
	19		24.21		24.75
CJ- IC5	19.51	19.7233	24.89	25.1967	27.59	27.665		0.0322429	0.00477186
	19.86		25.22		27.74
	19.8		25.18		27.24
	20.2		25.19		27.11
CJ- IC6	20.6	20.375	25.74	25.7267	27.89	27.9		0.0352664	0.00634891
	20.15		25.81		28.13
	27.9		25.63		27.91
	19.16		25.21		28.56
CJ- IC7	22.88	22.795	29.84	29.78	27.69	27.77		0.0121313	0.036273
	23.02		29.83		28.63
	22.71		29.67		27.85
	23		32.71		29.16
CJ- IC8	22.8	22.875	26.13	26.14	33.53	34.47		0.147587	0.000400899
	23.16		27.09		34.76
	22.95		26.15		34.18		Mean	0.0474832	0.0105255
	25.97
GOS-X- IC1	12.47	12.62	28.47	28.5267	17.35	17.4267		2.68267e-05	0.0394396
	12.64		28.55		17.45
	12.63		28.56		17.48								CECUM
	12.59		36.14		18.72												procent %
GOS-X- IC2	14.66	14.745	27.86	27.87	18.59	18.6833		0.000178207	0.0716775					uni/LB	Uni/Bifido		uni/LB	Uni/Bifido
	14.83		28.71		18.69								GOS	2.68267e-05	0.0394396	GOS	0.00268267	3.94396
	14		27.88		18.77									0.000178207	0.0716775		0.0178207	7.16775
	14.03		36.66		21.13									0.000155639	0.0367179		0.0155639	3.67179
GOS-X- IC3	19.19	19.335	32.55	32.745	24.3	24.2767		0.000155639	0.0367179					0.000884465	0.0534839		0.0884465	5.34839
	19.79		34.17		24.2									0.000169899	0.0188412		0.0169899	1.88412
	18.89		32.94		24.33									5.52988e-05	0.030986		0.00552988	3.0986
	18.87		45		23.83									0.000873705	0.0588533		0.0873705	5.88533
GOS-X- IC4	15.6	15.63	26.24	26.385	19.98	20.0025		0.000884465	0.0534839					8.39122e-05	0.0481397		0.00839122	4.81397
	15.75		26.53		19.66									0.000552534	0.0308614		0.0552534	3.08614
	15.55		26.11		20.56									1.53039e-06	0.000927039		0.000153039	0.0927039
	15.62		27.35		19.81
GOS-X- IC5	15.29	15.51	28.94	28.72	21.48	21.415		0.000169899	0.0188412				CONTROL	0.0219649	0.00279583	CONTROL	2.19649	0.279583
	15.56		29.59		21.35									0.00381648	0.00343412		0.381648	0.343412
	15.53		28.5		21.01									0.000152677	0.0304124		0.0152677	3.04124
	15.44				20.72									0.00806936	0.00622239		0.806936	0.622239
GOS-X- IC6	18.43	18.35	34.01	33.2833	23.43	23.5367		5.52988e-05	0.030986					0.00173107	0.0514296		0.173107	5.14296
	18.27		33.11		23.67									0.0688823	0.00156596		6.88823	0.156596
	18.04		33.51		23.51									0.00419113	0.0008873		0.419113	0.08873
	23.73		33.23		23.04									0.000368082	0.00736155		0.0368082	0.736155
GOS-X- IC7	14.12	14.075	24.74	24.82	17.73	18.3		0.000873705	0.0588533
	15.79		25.04		18.46
	14.03		24.9		18.14
	24.66		26.61		19.64
GOS-X- IC8	13.25	13.27	26.88	27.49	17.69	17.7867		8.39122e-05	0.0481397
	13.95		27.5		17.86
	13.29		27.48		17.81
	20.65		29.43		19.33
GOS-X- IC9	13.99	14.03	25.22	25.4567	19.13	19.2033		0.000552534	0.0308614
	14.53		25.62		19.23
	14.07		25.53		19.25
	22.62		28.31		19.55
GOS-X- IC10	17.19	16.91	37.16	37.16	26.94	27.2467		1.53039e-06	0.000927039
	18.42		45		27.11
	16.63				27.27		Mean	0.000298202	0.0389928
	27.47				27.36
CX- IC1	15.91	15.865	21.74	21.84	24.64	24.575		0.0219649	0.00279583
	15.82		21.98		24.61
	15.55		21.71		24.5
	18.05		21.93		24.55
CX- IC2	15.31	15.225	23.8	23.795	23.54	23.63		0.00381648	0.00343412
	15.57		24		23.57
	15.14		23.79		23.65
	17.84		24.02		23.76
CX- IC3	16.17	15.555	28.66	28.925	20.64	20.7567		0.000152677	0.0304124
	15.25		29.12		20.64
	15.86		28.8		20.99
	17.02		29.59		21.3
CX- IC4	15.28	15.235	22.78	22.69	22.75	22.7667		0.00806936	0.00622239
	15.19		23.45		22.68
	14.2		22.66		23.49
	14.51		22.63		22.87
CX- IC5	16.79	16.74	26.42	26.515	21.27	21.175		0.00173107	0.0514296
	17.6		26.61		22.26
	16.69		25.84		21.08
	24.05		33.5		30.59
CX- IC6	15.31	15.4875	19.76	19.7533	25	25.0475		0.0688823	0.00156596
	15.5		19.8		25.03
	15.57		19.7		25.05
	15.57		20.65		25.11
CX- IC7	13.41	13.4975	21.85	21.8967	23.79	23.8833		0.00419113	0.0008873
	13.46		21.96		23.91
	13.56		21.88		23.95
	13.56		23.18		24.01
CX- IC8	15.2	15.315	27.19	27.37	22.61	22.6		0.000368082	0.00736155
	15.43		27.43		22.32
	14.45		27.49		22.67		Mean	0.013647	0.0130136
	15		26.47		22.52

## Sheet: Gene expression-RT-qPCR
S1 File B. qPCR dataset for calculating gene abundances
Shortcuts userd: GOS - galactooligosaacharides; C - control; D - duodenum; J - jejunum; I - ileum; X - caecum; M - mucosa
All qPCR reactions were made in duplicates; results represented as dCt values
lp	Sample ID	Grupa	Tkanka	ACTB	Average	G6PDH	Average	GeoMean	AvBD1	Average	CATHL2	Average	CLDN1	Average	FFAR2	Average	FFAR4	Average	MUC6	Average	TJAP1	Average	IL1b	Average	IL10 (rot)	Average
1	C-D-M1	C	D	17.02	17.06	23.58	23.66	20.0908	25.83	25.76	28.47	28.33	27.1	27.18	28.98	28.94	23.87	23.82	27.72	27.655	24.15	24.215	27.95	27.975	29.98	30.035
	C-D-M1	C	D	17.1		23.74			25.69		28.19		27.26		28.9		23.77		27.59		24.28		28		30.09
2	C-D-M2	C	D	17.87	17.92	24.22	24.35	20.889	29.8	29.66	28.84	28.895	27.22	27.4	29.19	29.15	23.57	23.51	27.55	27.45	24.85	24.885	27.76	27.885	30.52	30.635
	C-D-M2	C	D	17.97		24.48			29.52		28.95		27.58		29.11		23.45		27.35		24.92		28.01		30.75
3	C-D-M3	C	D	17.87	17.905	23.48	23.575	20.5453	26.48	26.37	28.9	28.94	26.46	26.61	30.32	30.285	25.18	25.12	26.78	26.78	24.54	24.555	28.52	28.565	31.66	31.79
	C-D-M3	C	D	17.94		23.67			26.26		28.98		26.76		30.25		25.06		26.78		24.57		28.61		31.92
4	C-D-M4	C	D	17.32	17.52	23.27	23.415	20.2542	24.09	23.555	27.08	27.065	26.54	26.655	29.24	29.17	26.01	26.06	27.62	27.525	24.23	24.29	27.72	27.64	30.16	30.33
	C-D-M4	C	D	17.72		23.56			23.02		27.05		26.77		29.1		26.11		27.43		24.35		27.56		30.5
5	C-D-M5	C	D	17.69	17.665	23.84	23.88	20.5387	28.56	28.41	30.58	30.735	26.31	26.33	28.14	27.95	25.36	25.485	27.07	27.14	24.66	24.73	27.86	27.86	31.25	31.11
	C-D-M5	C	D	17.64		23.92			28.26		30.89		26.35		27.76		25.61		27.21		24.8		27.86		30.97
6	C-D-M6	C	D	18.78	18.755	24.96	24.915	21.6167	27.82	27.695	29.54	29.555	28.48	28.54	28.66	28.57	27.21	27.24	28.54	28.525	26.53	26.58	28.94	28.995	32.58	32.525
	C-D-M6	C	D	18.73		24.87			27.57		29.57		28.6		28.48		27.27		28.51		26.63		29.05		32.47
7	C-D-M7	C	D	18.88	18.875	24.45	24.295	21.4142	27.87	27.89	29.18	29.335	27.34	27.56	28.31	28.18	24.37	24.445	26.96	26.935	24.75	24.815	28.25	28.22	30.7	30.91
	C-D-M7	C	D	18.87		24.14			27.91		29.49		27.78		28.05		24.52		26.91		24.88		28.19		31.12
8	C-D-M8	C	D	17.34	17.38	24.14	23.515	20.2161	24.17	24.08	27.07	27.1	27.19	27.275	28.98	28.86	23.64	23.64	26.73	26.785	24.73	24.78	26.81	26.835	29.83	29.86
	C-D-M8	C	D	17.42		22.89			23.99		27.13		27.36		28.74		23.64		26.84		24.83		26.86		29.89
9	C-J-M1	C	J	16.98	16.895	23.09	23.13	19.7682	24.11	23.98	26.12	26.115	27.53	27.375	28.6	28.63	24.59	24.63	27.92	27.93	24.04	24	27.29	27.385	29.77	29.63
	C-J-M1	C	J	16.81		23.17			23.85		26.11		27.22		28.66		24.67		27.94		23.96		27.48		29.49
10	C-J-M2	C	J	17.32	17.4	23.61	23.675	20.2964	25.88	25.815	28.21	28.335	27.82	27.775	29.62	29.665	24.79	24.765	29.47	29.275	24.35	24.305	28.67	28.68	31.7	31.46
	C-J-M2	C	J	17.48		23.74			25.75		28.46		27.73		29.71		24.74		29.08		24.26		28.69		31.22
11	C-J-M3	C	J	16.2	16.26	22.89	22.94	19.3133	25.49	25.505	27.72	27.725	26.05	26.11	29.8	29.71	24.21	24.105	27	26.985	23.84	23.81	27.87	27.76	30.08	30.285
	C-J-M3	C	J	16.32		22.99			25.52		27.73		26.17		29.62		24		26.97		23.78		27.65		30.49
12	C-J-M4	C	J	17.27	17.245	24.21	24.315	20.4771	28.53	28.595	31.43	31.29	27.78	27.755	29.46	29.48	25.93	25.855	29.9	29.865	24.9	24.865	29.86	29.91	30.6	30.565
	C-J-M4	C	J	17.22		24.42			28.66		31.15		27.73		29.5		25.78		29.83		24.83		29.96		30.53
13	C-J-M5	C	J	16.74	16.79	22.73	22.765	19.5506	26.61	26.55	28.59	28.555	27.13	27.06	27.89	27.895	24.06	24.11	28.58	28.57	24.15	24.145	27.95	27.955	30.34	30.31
	C-J-M5	C	J	16.84		22.8			26.49		28.52		26.99		27.9		24.16		28.56		24.14		27.96		30.28
14	C-J-M6	C	J	17.83	17.81	23.97	24.06	20.7004	27.65	27.6	29.7	29.8	27.93	27.92	29.79	29.795	25.01	25.005	28.15	28.1	24.78	24.805	30.1	30.02	31.71	31.66
	C-J-M6	C	J	17.79		24.15			27.55		29.9		27.91		29.8		25		28.05		24.83		29.94		31.61
15	C-J-M7	C	J	19.87	19.955	24.76	24.87	22.2774	28.46	28.405	30.66	30.695	28.51	28.515	28.86	28.94	25.67	25.67	28.68	28.77	25.07	25.055	29.73	29.75	32.58	32.37
	C-J-M7	C	J	20.04		24.98			28.35		30.73		28.52		29.02		25.67		28.86		25.04		29.77		32.16
16	C-J-M8	C	J	18.04	18.075	23.55	23.64	20.6711	28.82	28.825	31.74	31.78	27.99	27.9	29.29	29.125	25.8	25.755	26.98	26.935	24.17	24.19	29.91	29.76	32.23	32.23
	C-J-M8	C	J	18.11		23.73			28.83		31.82		27.81		28.96		25.71		26.89		24.21		29.61
17	C-I-M1	C	I	15.96	16.14	22.57	22.655	19.122	28.23	28.13	30.34	30.41	26.87	26.81	27.9	27.905	24.16	24.19	27.69	27.715	24.13	24.11	26.5	26.57	28.1	28.12
	C-I-M1	C	I	16.32		22.74			28.03		30.48		26.75		27.91		24.22		27.74		24.09		26.64		28.14
18	C-I-M2	C	I	17.79	17.845	22.98	23.08	20.2944	27.82	27.74	29.84	29.875	27.44	27.39	29.61	29.57	24.27	24.31	30.75	30.705	24.96	25.015	26.69	26.825	29.49	29.475
	C-I-M2	C	I	17.9		23.18			27.66		29.91		27.34		29.53		24.35		30.66		25.07		26.96		29.46
19	C-I-M4	C	I	16.63	16.67	22.23	22.35	19.3022	24.78	24.775	26.77	26.87	27.22	27.075	28.78	28.88	24.73	24.765	30.65	30.605	25.03	25.11	26.88	26.86	29.66	29.57
	C-I-M4	C	I	16.71		22.47			24.77		26.97		26.93		28.98		24.8		30.56		25.19		26.84		29.48
20	C-I-M5	C	I	16.11	16.115	22.06	22.115	18.8781	27.16	27.15	29.71	29.765	26.91	26.885	27.56	27.635	23.85	23.87	29.46	29.46	24.63	24.675	26.35	26.475	28.64	28.705
	C-I-M5	C	I	16.12		22.17			27.14		29.82		26.86		27.71		23.89		29.46		24.72		26.6		28.77
21	C-I-M6	C	I	17.56	17.55	22.53	22.5	19.8715	27.16	27.195	28.98	29.075	27.18	27.195	28.63	28.54	23.84	23.855	27.15	27.235	24.6	24.67	26.7	26.74	28.72	28.86
	C-I-M6	C	I	17.54		22.47			27.23		29.17		27.21		28.45		23.87		27.32		24.74		26.78		29
22	C-I-M7	C	I	17.32	17.38	22.2	22.16	19.625	28.23	28.21	30.72	30.745	26.76	26.605	26.62	26.605	23.54	23.52	27.87	27.96	23.88	23.915	27.6	27.64	29.82	29.74
	C-I-M7	C	I	17.44		22.12			28.19		30.77		26.45		26.59		23.5		28.05		23.95		27.68		29.66
23	C-I-M8	C	I	17.01	17.04	22.47	22.49	19.5763	24.96	25.095	27.51	27.505	26.69	26.69	27.97	28.02	25.03	25.06	26.73	26.755	24.54	24.59	26.21	26.32	29	28.915
	C-I-M8	C	I	17.07		22.51			25.23		27.5		26.69		28.07		25.09		26.78		24.64		26.43		28.83
24	GOS-D-M1	GOS	D	18.46	18.295	24.16	24.23	21.0544	28.16	28.1	30.83	30.85	27.57	27.415	28.96	28.995	27.01	26.93	28.32	28.16	25.03	25.08	28.07	28.315	31.6	31.62
	GOS-D-M1	GOS	D	18.13		24.3			28.04		30.87		27.26		29.03		26.85		28		25.13		28.56		31.64
25	GOS-D-M2	GOS	D	18.51	18.51	23.42	23.47	20.843	26.14	26.225	28.17	28.075	26.14	26.31	29.05	28.93	25.78	25.815	27.85	27.89	24.81	24.88	28	27.91	31.56	31.54
	GOS-D-M2	GOS	D	18.51		23.52			26.31		27.98		26.48		28.81		25.85		27.93		24.95		27.82		31.52
26	GOS-D-M3	GOS	D	16.74	16.74	21.79	21.825	19.1141	24.16	24.195	26.7	26.72	26.58	26.64	27.59	27.47	24.95	24.95	26.2	26.22	24.12	24.215	25.66	25.725	29.56	29.4
	GOS-D-M3	GOS	D	16.74		21.86			24.23		26.74		26.7		27.35		24.95		26.24		24.31		25.79		29.24
27	GOS-D-M4	GOS	D	18.5	18.505	23.03	23.085	20.6685	31.53	31.575	33.27	33.66	26.77	26.72	29.3	29.37	25.74	25.69	26.33	26.34	24.63	24.715	28.21	28.25	31.16	31.595
	GOS-D-M4	GOS	D	18.51		23.14			31.62		34.05		26.67		29.44		25.64		26.35		24.8		28.29		32.03
28	GOS-D-M5	GOS	D	18.7	18.71	23.68	23.685	21.051	27.44	27.475	29.19	29.25	27.56	27.535	28.11	28.025	26.81	26.785	27.46	27.53	25.36	25.495	27.71	27.68	30.2	30.49
	GOS-D-M5	GOS	D	18.72		23.69			27.51		29.31		27.51		27.94		26.76		27.6		25.63		27.65		30.78
29	GOS-D-M6	GOS	D	18.97	18.925	24.75	24.695	21.6183	23.96	24.045	26.35	26.385	27.81	27.755	29.62	29.63	26.53	26.525	28.14	28.19	25.55	25.605	28.83	28.65	30.15	30.2
	GOS-D-M6	GOS	D	18.88		24.64			24.13		26.42		27.7		29.64		26.52		28.24		25.66		28.47		30.25
30	GOS-D-M7	GOS	D	18.83	18.775	24.17	24.14	21.2892	30.68	32.03	34.8	34.65	27.57	27.525	29.15	29.225	26.8	26.835	28.21	28.235	25.63	25.655	30.1	30.195	31.21	31.555
	GOS-D-M7	GOS	D	18.72		24.11			33.38		34.5		27.48		29.3		26.87		28.26		25.68		30.29		31.9
31	GOS-D-M8	GOS	D	19.04	19.015	24.31	24.37	21.5266	29.75	29.775	31.72	31.74	27.89	27.845	29.86	29.75	26.58	26.625	27.84	27.915	25.68	25.755	27.79	27.86	31.75	31.66
	GOS-D-M8	GOS	D	18.99		24.43			29.8		31.76		27.8		29.64		26.67		27.99		25.83		27.93		31.57
32	GOS-D-M9	GOS	D	18.65	18.69	23.78	23.765	21.0753	28.78	28.885	31.63	31.59	26.52	26.485	28.7	28.68	24.64	24.685	26.24	26.305	24.33	24.435	28.03	28.13	31.95	31.995
	GOS-D-M9	GOS	D	18.73		23.75			28.99		31.55		26.45		28.66		24.73		26.37		24.54		28.23		32.04
33	GOS-D-M10	GOS	D	18.53	18.59	23.9	24.01	21.1269	27.26	27.31	29.86	29.97	27.23	27.26	29.63	29.695	25.43	25.545	27.14	27.055	24.47	24.475	28.06	27.945	31.11	31.1
	GOS-D-M10	GOS	D	18.65		24.12			27.36		30.08		27.29		29.76		25.66		26.97		24.48		27.83		31.09
34	GOS-I-M1	GOS	I	16.04	16.07	22.02	22.225	18.8986	27.65	27.645	29.58	29.71	26.52	26.655	27.12	27.16	23.75	23.75	28.82	28.665	24.34	24.28	25.67	25.565	27.5	27.57
	GOS-I-M1	GOS	I	16.1		22.43			27.64		29.84		26.79		27.2		23.75		28.51		24.22		25.46		27.64
35	GOS-I-M2	GOS	I	16.96	16.99	22.17	22.295	19.4626	26.16	26.165	28.64	28.74	26.86	26.91	27.78	27.77	23.66	23.67	27.73	27.72	24.94	24.87	27.61	27.54	29.97	29.915
	GOS-I-M2	GOS	I	17.02		22.42			26.17		28.84		26.96		27.76		23.68		27.71		24.8		27.47		29.86
36	GOS-I-M3	GOS	I	16.88	16.875	22.82	22.965	19.6859	28.27	28.21	28.6	28.54	27.48	27.34	28.3	28.29	23.27	23.265	27.93	27.875	25.14	25.03	27.44	27.29	29.8	29.705
	GOS-I-M3	GOS	I	16.87		23.11			28.15		28.48		27.2		28.28		23.26		27.82		24.92		27.14		29.61
37	GOS-I-M4	GOS	I	17.76	17.75	23.05	23.025	20.2162	31.05	31.085	28.77	28.69	27.07	27.12	28.17	28.16	23.1	23.11	27.77	27.67	25.17	25.08	27.52	27.495	29.96	30.06
	GOS-I-M4	GOS	I	17.74		23			31.12		28.61		27.17		28.15		23.12		27.57		24.99		27.47		30.16
38	GOS-I-M5	GOS	I	16.65	16.67	22.15	22.115	19.2004	29.47	29.47	31.93	31.79	25.88	25.985	27.12	27.125	23.14	23.175	26.7	26.62	24.55	24.505	26.66	26.605	28.93	28.9
	GOS-I-M5	GOS	I	16.69		22.08			29.47		31.65		26.09		27.13		23.21		26.54		24.46		26.55		28.87
39	GOS-I-M6	GOS	I	17.71	17.735	23.91	23.895	20.5859	23.76	23.705	25.55	25.56	27.64	27.505	27.95	28.02	24.49	24.535	29.19	29.05	25.74	25.685	27.65	27.68	29.1	29.17
	GOS-I-M6	GOS	I	17.76		23.88			23.65		25.57		27.37		28.09		24.58		28.91		25.63		27.71		29.24
40	GOS-I-M7	GOS	I	17.48	17.505	22.81	22.795	19.9756	29.16	29.05	31.25	31.43	26.94	27.05	27.7	27.735	23.75	23.765	28.5	28.485	25.08	25.095	27.5	27.15	27.93	27.865
	GOS-I-M7	GOS	I	17.53		22.78			28.94		31.61		27.16		27.77		23.78		28.47		25.11		26.8		27.8
41	GOS-I-M8	GOS	I	16.65	16.67	23.05	23.155	19.6467	28.55	28.505	31.05	30.93	26.08	26.19	27.24	27.295	23.32	23.41	27.82	27.935	24.13	24.12	26.01	26.045	28.03	28.05
	GOS-I-M8	GOS	I	16.69		23.26			28.46		30.81		26.3		27.35		23.5		28.05		24.11		26.08		28.07
42	GOS-I-M9	GOS	I	16.61	16.65	22.88	22.895	19.5244	26.22	26.22	29.34	29.335	26.57	26.445	27.2	27.17	24.01	24.03	26.62	26.605	24.44	24.39	26.15	26.09	27.59	27.585
	GOS-I-M9	GOS	I	16.69		22.91			26.22		29.33		26.32		27.14		24.05		26.59		24.34		26.03		27.58
43	GOS-J-M1	GOS	J	18.22	18.26	24.1	24.195	21.0191	27.75	27.61	28.62	28.7	26.08	26.935	28.66	28.49	23.24	23.37	27.7	27.67	25.18	25.155	27.59	27.545	29.81	29.905
	GOS-J-M1	GOS	J	18.3		24.29			27.47		28.78		27.79		28.32		23.5		27.64		25.13		27.5		30
44	GOS-J-M2	GOS	J	18.42	18.455	24.06	24.19	21.1288	30	29.96	28.52	28.565	26.77	26.91	28.72	28.635	23.02	23.07	27.53	27.565	25.17	25.155	27.46	27.34	29.97	30.115
	GOS-J-M2	GOS	J	18.49		24.32			29.92		28.61		27.05		28.55		23.12		27.6		25.14		27.22		30.26
45	GOS-J-M3	GOS	J	17.08	17.105	22.83	22.925	19.8023	28.45	28.445	28.54	28.575	26.79	26.79	28.57	28.63	22.9	22.945	27.35	27.455	25.13	25.14	27.27	27.21	29.82	29.88
	GOS-J-M3	GOS	J	17.13		23.02			28.44		28.61		26.79		28.69		22.99		27.56		25.15		27.15		29.94
46	GOS-J-M4	GOS	J	18.86	18.88	24.61	24.665	21.5795	32.48	32.615	28.23	28.195	26.605	26.605	27.54	27.62	21.67	21.78	27.32	27.405	25.46	25.405	27.55	27.445	29.97	30.005
	GOS-J-M4	GOS	J	18.9		24.72			32.75		28.16		26.605		27.7		21.89		27.49		25.35		27.34		30.04
47	GOS-J-M5	GOS	J	17.99	17.98	24.13	24.305	20.9046	28.87	28.785	31.7	31.64	27.02	27.2	28.01	27.96	25.08	25.14	27.28	27.31	25.14	25.135	27.91	27.865	30.87	30.935
	GOS-J-M5	GOS	J	17.97		24.48			28.7		31.58		27.38		27.91		25.2		27.34		25.13		27.82		31
48	GOS-J-M6	GOS	J	18.3	18.285	24.53	24.68	21.2432	23.29	23.245	25.18	25.21	27.58	27.655	28.07	27.995	26.14	26.24	29.17	29.21	25.88	25.9	28.06	28.13	29.44	29.585
	GOS-J-M6	GOS	J	18.27		24.83			23.2		25.24		27.73		27.92		26.34		29.25		25.92		28.2		29.73
49	GOS-J-M7	GOS	J	17.92	17.84	23.31	23.4	20.4317	30.75	30.805	33.05	33.095	27.5	27.5	27.7	27.775	25.11	25.405	27.73	27.76	24.54	24.57	28.9	29.185	29.94	29.99
	GOS-J-M7	GOS	J	17.76		23.49			30.86		33.14		27.5		27.85		25.7		27.79		24.6		29.47		30.04
50	GOS-J-M8	GOS	J	17.81	17.84	23.49	23.56	20.5015	29.34	29.265	28.29	28.215	27.45	27.55	28.4	28.385	23.32	23.34	27.37	27.46	25.07	25.115	27.45	27.39	29.94	29.985
	GOS-J-M8	GOS	J	17.87		23.63			29.19		28.14		27.65		28.37		23.36		27.55		25.16		27.33		30.03
51	GOS-J-M9	GOS	J	17	17.03	23.07	23.145	19.8534	30.03	29.95	28.35	28.29	27.6	27.675	28.31	28.325	23.18	23.22	27.51	27.575	25.13	25.125	27.28	27.36	30.16	30.01
	GOS-J-M9	GOS	J	17.06		23.22			29.87		28.23		27.75		28.34		23.26		27.64		25.12		27.44		29.86
52	GOS-J-M10	GOS	J	18.09	18.1	23.13	23.275	20.525	27.48	27.415	28.54	28.505	27.71	27.73	28.56	28.645	23.06	23.08	27.6	27.685	25.21	25.245	27.23	27.37	30.73	30.625
	GOS-J-M10	GOS	J	18.11		23.42			27.35		28.47		27.75		28.73		23.1		27.77		25.28		27.51		30.52
53	C- X-M1	C	X	17.58	17.585	22.35	22.435	19.8625	24.82	24.815	27.32	27.375	27.71	27.63	28.93	28.945	22.08	22.145	27.66	27.695	25.51	25.515	27.17	27.045	29.81	29.54
	C- X-M1	C	X	17.59		22.52			24.81		27.43		27.55		28.96		22.21		27.73		25.52		26.92		29.27
54	C- X-M2	C	X	16.98	17.065	21.97	22.03	19.3892	26.53	26.39	27.62	27.68	27.14	27.07	28.7	28.62	21.91	21.95	26.84	26.955	25.2	25.255	26.32	26.42	30.27	30.125
	C- X-M2	C	X	17.15		22.09			26.25		27.74		27		28.54		21.99		27.07		25.31		26.52		29.98
55	C- X-M3	C	X	16.95	17.02	21.25	21.38	19.0758	26.67	26.65	28.25	28.195	27.02	27.01	29.14	28.97	21.51	21.59	26.62	26.615	25.03	25.01	26.15	26.33	29.48	29.75
	C- X-M3	C	X	17.09		21.51			26.63		28.14		27		28.8		21.67		26.61		24.99		26.51		30.02
56	C- X-M4	C	X	17.84	17.87	22.1	22.15	19.8952	24.32	24.315	27.76	27.74	28.63	28.645	29.93	30.03	22.49	22.495	29.53	29.625	26.58	26.545	27.7	27.605	32.14	31.91
	C- X-M4	C	X	17.9		22.2			24.31		27.72		28.66		30.13		22.5		29.72		26.51		27.51		31.68
57	C- X-M5	C	X	18.88	18.945	24.74	24.93	21.7324	26.08	26.015	28.72	28.58	28.87	28.77	29.13	29.205	23.98	23.97	28.59	28.435	26.81	26.845	27.85	27.86	30.94	30.98
	C- X-M5	C	X	19.01		25.12			25.95		28.44		28.67		29.28		23.96		28.28		26.88		27.87		31.02
58	C- X-M6	C	X	16.57	16.65	22.45	22.57	19.3853	23.5	23.51	27.53	27.505	27.21	27.27	28.29	28.285	22.97	22.975	27.26	27.245	25.19	25.105	27.44	27.48	29.68	29.8
	C- X-M6	C	X	16.73		22.69			23.52		27.48		27.33		28.28		22.98		27.23		25.02		27.52		29.92
59	C- X-M7	C	X	18.84	18.915	23.91	23.98	21.2975	26.63	26.435	27.95	27.98	27.57	27.58	28.6	28.475	22.98	22.98	27.62	27.425	25.54	25.41	27.44	27.455	29.82	30.265
	C- X-M7	C	X	18.99		24.05			26.24		28.01		27.59		28.35		22.98		27.23		25.28		27.47		30.71
60	C- X-M8	C	X	18.45	18.51	22.91	22.955	20.613	26.9	26.91	28.87	28.72	28.13	28.215	29.07	29.06	22.51	22.51	27.62	27.61	25.98	25.895	27.65	27.54	31.02	30.875
	C- X-M8	C	X	18.57		23			26.92		28.57		28.3		29.05		22.51		27.6		25.81		27.43		30.73
61	GOS- X-M1	GOS	X	18.28	18.315	24.54	24.58	21.2175	26.75	26.61	28.03	28.055	27.99	27.975	29.21	29.075	22.3	22.315	28.05	28	25.76	25.835	27.01	27.095	29.93	30.135
	GOS- X-M1	GOS	X	18.35		24.62			26.47		28.08		27.96		28.94		22.33		27.95		25.91		27.18		30.34
62	GOS- X-M2	GOS	X	18	18.055	23.95	24	20.8163	21.64	21.585	26.22	26.27	27.31	27.31	28.97	28.91	22.11	22.075	27.04	26.975	25.51	25.485	26.56	26.63	30.14	30.065
	GOS- X-M2	GOS	X	18.11		24.05			21.53		26.32		27.31		28.85		22.04		26.91		25.46		26.7		29.99
63	GOS- X-M3	GOS	X	18.27	18.355	23.18	23.24	20.6536	25.82	25.8	28.91	28.905	27.65	27.655	29.24	29.375	21.44	21.395	26.29	26.26	25.65	25.315		26.51	30.15	30.16
	GOS- X-M3	GOS	X	18.44		23.3			25.78		28.9		27.66		29.51		21.35		26.23		24.98		26.51		30.17
64	GOS- X-M4	GOS	X	17.65	17.63	24.91	24.945	20.9709	25.17	25.095	27.83	27.865	26.87	26.87	28.87	28.905	20.23	20.21	26.99	26.855	25.88	25.73	26.66	26.595	30.01	30.005
	GOS- X-M4	GOS	X	17.61		24.98			25.02		27.9		26.87		28.94		20.19		26.72		25.58		26.53		30
65	GOS- X-M5	GOS	X	17.58	17.59	22.73	22.775	20.0153	23.46	23.445	25.6	25.62	27.15	27.115	27.71	28.02	23.6	23.645	26.76	26.68	25.51	25.55	25.15	25.175	28.77	28.78
	GOS- X-M5	GOS	X	17.6		22.82			23.43		25.64		27.08		28.33		23.69		26.6		25.59		25.2		28.79
66	GOS- X-M6	GOS	X	17.86	17.925	22.17	22.25	19.9708	21.22	21.275	23.2	23.145	27.76	27.7	28.13	28.145	22.67	22.645	28.49	28.545	25.69	25.72	25.14	25.285	29.63	29.63
	GOS- X-M6	GOS	X	17.99		22.33			21.33		23.09		27.64		28.16		22.62		28.6		25.75		25.43		29.63
67	GOS- X-M7	GOS	X	18.46	18.505	23.33	23.44	20.8268	26.78	26.805	28.03	27.97	27.87	27.715	28.57	28.645	22.9	22.925	27.33	27.29	25.64	25.605	27.2	27.26	30.12	30.1
	GOS- X-M7	GOS	X	18.55		23.55			26.83		27.91		27.56		28.72		22.95		27.25		25.57		27.32		30.08
68	GOS- X-M8	GOS	X	19.13	19.165	24.31	24.425	21.6357	25.3	25.325	27.91	27.845	27.83	27.82	28.82	28.765	22.63	22.63	27.52	27.52	25.72	25.76	27.24	27.35	29.81	29.915
	GOS- X-M8	GOS	X	19.2		24.54			25.35		27.78		27.81		28.71		22.63		27.52		25.8		27.46		30.02
69	GOS- X-M9	GOS	X	18.55	18.58	25.27	25.395	21.7219	25.61	25.615	27.75	27.61	27.64	27.77	29.08	29.065	22.02	22.005	27.52	27.58	25.71	25.67	26.93	26.935	30.86	30.68
	GOS- X-M9	GOS	X	18.61		25.52			25.62		27.47		27.9		29.05		21.99		27.64		25.63		26.94		30.5
70	GOS- X-M10	GOS	X	17.29	17.39	21.53	21.58	19.372	26.05	26.055	29.05	28.925	27.83	27.725	28.51	28.65	22.05	22.01	27.44	27.485	25.56	25.565	25.6	25.665	29.9	29.695
	GOS- X-M10	GOS	X	17.49		21.63			26.06		28.8		27.62		28.79		21.97		27.53		25.57		25.73		29.49
